# Supplementary material for: Highly dispersed Co nanoparticles decorated on a N-doped defective carbon nano-framework for a hybrid Na–air battery
Source: Royal Society of Chemistry journal article supplement (doi:10.1039/c9dt04073k), 2020-01-01
Supplement: c9dt04073k1.pdf [file c9dt04073k1.pdf]

### Supplementary Information

#### **Highly dispersed Co nanoparticles decorated on N-doped defective carbon nano-framework for hybrid Na-Air battery**

Jingyi Zhu<sup>a#</sup>, Tao Qu<sup>a, b#</sup>, Fengmei Su<sup>a</sup>, Yuqi Wu<sup>a</sup>, Yao Kang<sup>c,\*</sup>, Kunfeng Chen<sup>d</sup>,  
Yaochun Yao<sup>a</sup>, Wenhui Ma<sup>a</sup>, Bing Yang<sup>a</sup>, Yongnian Dai<sup>a</sup>, Feng Liang<sup>a,b,\*</sup>, Dongfeng  
Xue<sup>d</sup>

<sup>a</sup> Faculty of Metallurgical and Energy Engineering, Kunming University of Science and Technology, Kunming 650093, China

<sup>b</sup> State Key Laboratory of Complex Nonferrous Metal Resources Clean Utilization, Kunming University of Science and Technology, Kunming 650093, China

<sup>c</sup> Institute of Applied Physics and Materials Engineering, University of Macau, Avenida da Universidade, Taipa, Macau, China

<sup>d</sup> State Key Laboratory of Rare earth Resources Utilization, Chinese Academy of Science, Changchun 130022, China

(#The contributions of Jingyi Zhu and Tao Qu are equal and are the first authors.)

Table S1. Performance of bifunctional catalysts derived from Co-MOF for ORR and OER.

| Catalysts   | Electrolyte | Onset Potential (V) | Half-wave potential (V) | J at 1.6 V (mA cm <sup>-2</sup> ) | Ref.         |
|-------------|-------------|---------------------|-------------------------|-----------------------------------|--------------|
| BNPC-1100   | 0.1 M KOH   | 0.894               | 0.793                   | 4.7                               | [1]          |
| Co@N-CNTF-2 | 0.1 M KOH   | 0.91                | 0.81                    | 10                                | [2]          |
| CoZn-NC-700 | 0.1 M KOH   | 0.97                | 0.84                    | 6.0                               | [3]          |
| MnO@Co/N-C  | 0.1 M KOH   | 0.88                | 0.83                    | 2.4                               | [4]          |
| Co-CoP-HNC  | 0.1 M KOH   | 0.94                | 0.83                    | 140                               | [5]          |
| Co-CoO-C    | 0.1 M KOH   | 0.90                | 0.82                    | 4.0                               | [6]          |
| Co-N-C-0    | 0.1 M KOH   | 0.85                | 0.81                    | 1.5                               | Present work |
| Co-N-C-0.2  | 0.1 M KOH   | 0.87                | 0.80                    | 2.5                               | Present work |
| Co-N-C-0.5  | 0.1 M KOH   | 0.92                | 0.82                    | 4.4                               | Present work |

Table S2. The atomic percentage of fitted peaks of N 1s in Co-N-C catalysts

| Catalysts  | Pyridine N (at %) | Pyrrolic N (at %) | CoN <sub>x</sub> (at %) |
|------------|-------------------|-------------------|-------------------------|
| Co-N-C-0   | 0.13              | 0.09              | 0.11                    |
| Co-N-C-0.2 | 0.08              | 0.17              | 0.13                    |
| Co-N-C-0.5 | 0.14              | 0.13              | 0.30                    |

Table S3. Atomic ratio of  $\text{Co}^{3+}$ ,  $\text{Co}^{2+}$ , and  $\text{Co}^0$  in Co-N-C catalysts calculated by XPS

| Catalysts  | $\text{Co}^{3+}$ (at %) | $\text{Co}^{2+}$ (at %) | $\text{Co}^0$ (at %) |
|------------|-------------------------|-------------------------|----------------------|
| Co-N-C-0   | 0.06                    | 0.06                    | 0.01                 |
| Co-N-C-0.2 | 0.07                    | 0.05                    | 0.01                 |
| Co-N-C-0.5 | 0.07                    | 0.02                    | 0.01                 |

Table S4. Discharge–charge performance of hybrid sodium-air batteries with different catalysts

| Catalysts                                          | Discharge voltage (V) | Charge voltage (V) | Voltage gap (V) | Current densities         | Roundtrip efficiency (%) | Ref.         |
|----------------------------------------------------|-----------------------|--------------------|-----------------|---------------------------|--------------------------|--------------|
| Mn <sub>3</sub> O <sub>4</sub> /C                  | 2.60                  | 3.51               | 0.91            | 1 mA·cm <sup>-2</sup>     | 74.07                    | [7]          |
| Co <sub>3</sub> (PO <sub>4</sub> ) <sub>2</sub>    | 2.82                  | 3.41               | 0.59            | 0.01 mA·cm <sup>-2</sup>  | 82.70                    | [8]          |
| <i>dp</i> -MnCo <sub>2</sub> O <sub>4</sub> /N-rGO | 2.75                  | 3.14               | 0.39            | 0.13 mA·cm <sup>-2</sup>  | 87.58                    | [9]          |
| Pt/C                                               | 2.85                  | 3.38               | 0.53            | 0.025 mA·cm <sup>-2</sup> | 84.32                    | [10]         |
| Carbon paper                                       | 2.6                   | 3.59               | 0.99            | 0.025 mA·cm <sup>-2</sup> | 72.42                    | [10]         |
| Carambol a-shaped VO <sub>2</sub>                  | 2.81                  | 3.45               | 0.64            | 0.01 mA·cm <sup>-2</sup>  | 81.45                    | [11]         |
| Pt/C                                               | 2.94                  | 3.55               | 0.61            | 0.01 mA·cm <sup>-2</sup>  | 82.82                    | [11]         |
| Pt/C                                               | 2.69                  | 3.20               | 0.51            | 0.1 mA·cm <sup>-2</sup>   | 84.06                    | Present work |
| Co-N-C-0                                           | 2.60                  | 3.17               | 0.57            | 0.1 mA·cm <sup>-2</sup>   | 82.02                    | Present work |

---

|         |      |      |      |                         |       |         |
|---------|------|------|------|-------------------------|-------|---------|
| Co-N-C- | 2.79 | 3.12 | 0.33 | 0.1 mA·cm <sup>-2</sup> | 89.42 | Present |
| 0.2     |      |      |      |                         |       | work    |
| Co-N-C- | 2.80 | 3.11 | 0.38 | 0.1 mA·cm <sup>-2</sup> | 90.03 | Present |
| 0.5     |      |      |      |                         |       | work    |

---

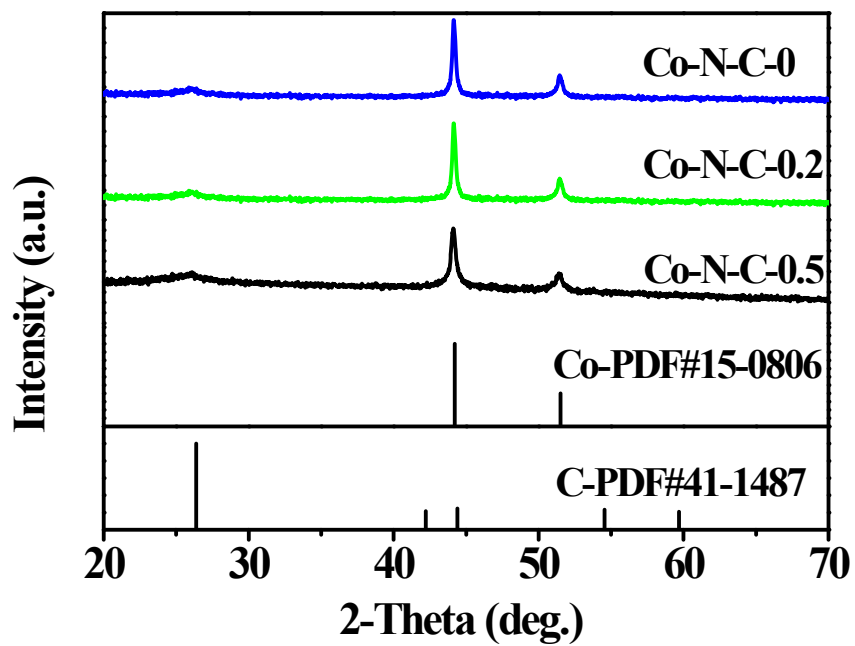

Figure S1. XRD patterns of Co-N-C-0, Co-N-C-0.2, and Co-N-C-0.5.

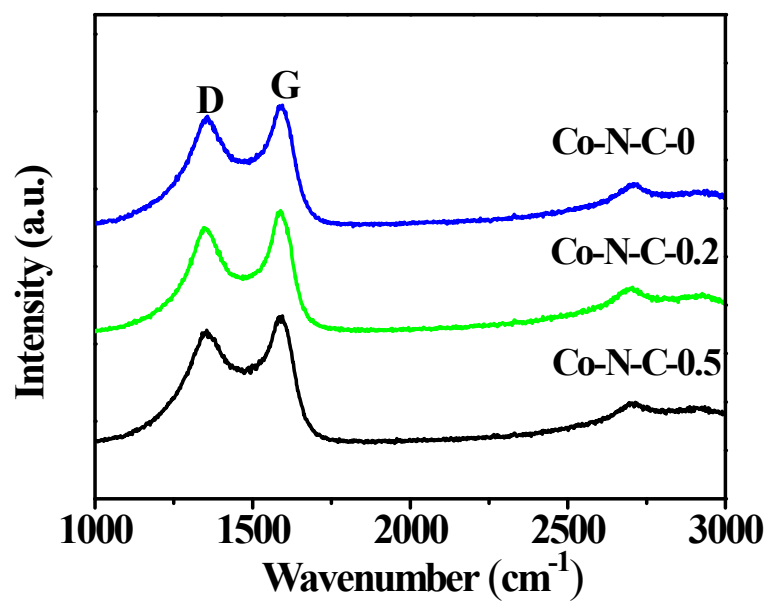

Figure S2. Raman spectra of Co-N-C-0, Co-N-C-0.2, and Co-N-C-0.5.



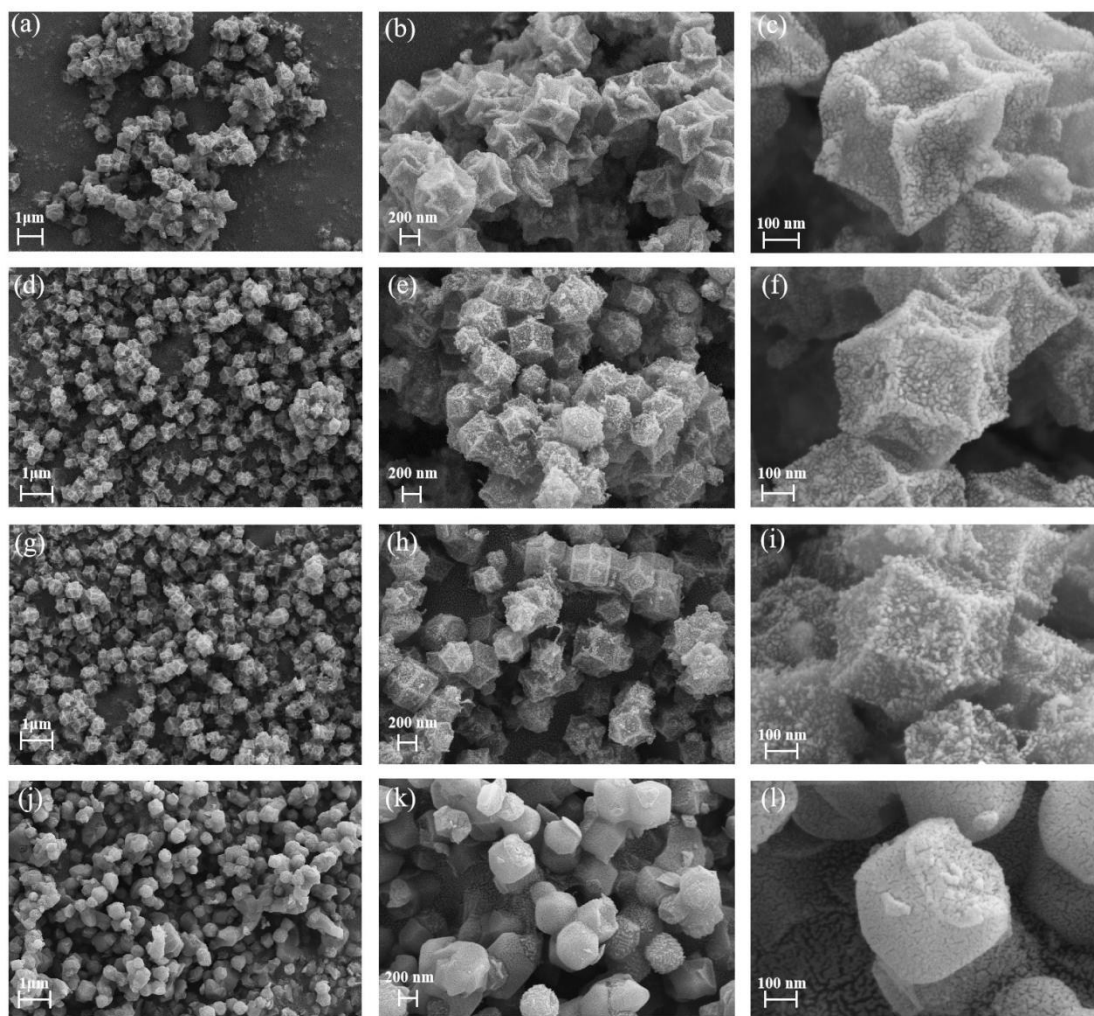

Figure S3. FESEM images of (a, b, c) Co-N-C-0; (d, e, f) Co-N-C-0.2; (g, h, i) Co-N-C-0.5; (j, k, l) Co-N-C-1.0.

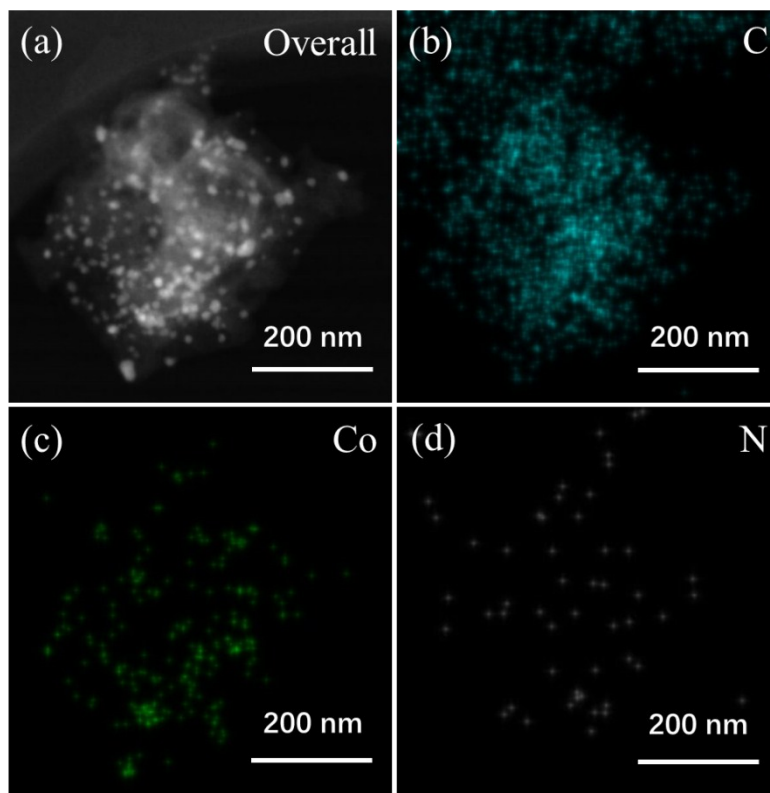

Figure S4. EDS elemental maps of Co-N-C-0.5.

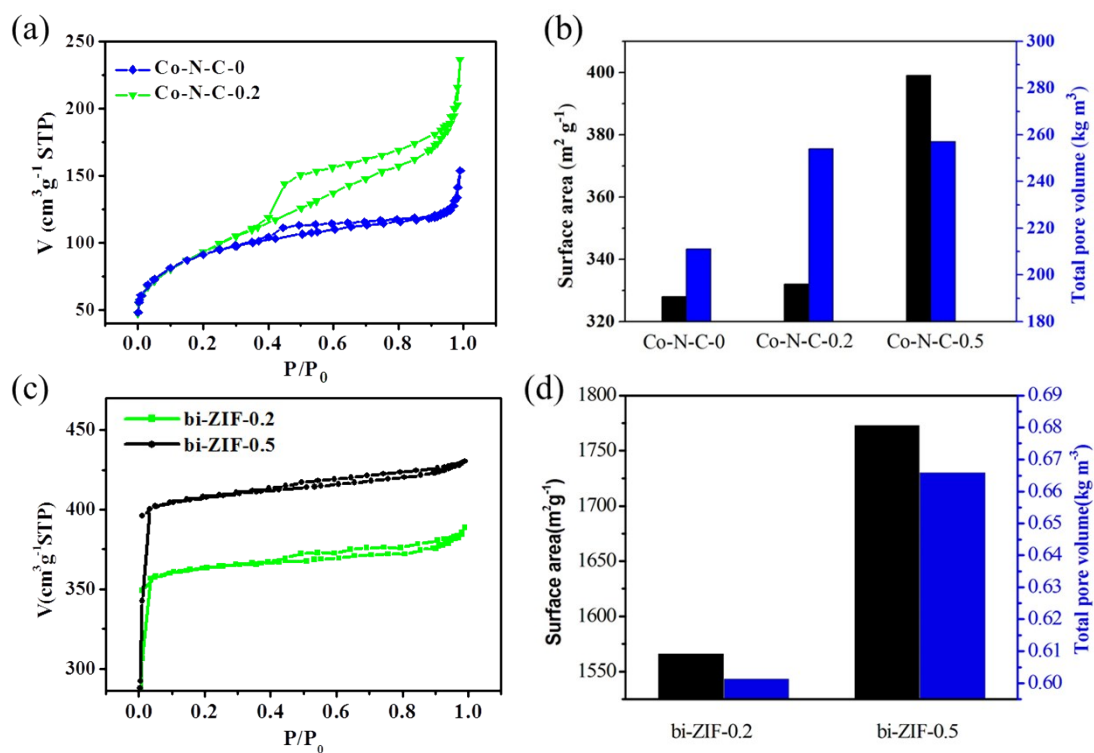

Figure S5. (a)  $N_2$  adsorption-desorption isotherms of Co-N-C-0 and Co-N-C-0.2; (b) surface area and total pore volume of Co-N-C-0, Co-N-C-0.2, and Co-N-C-0.5; (c)  $N_2$  adsorption-desorption isotherms of bi-ZIF-0.2 and bi-ZIF-0.5; (d) surface area and total pore volume of bi-ZIF-0.2 and bi-ZIF-0.5.

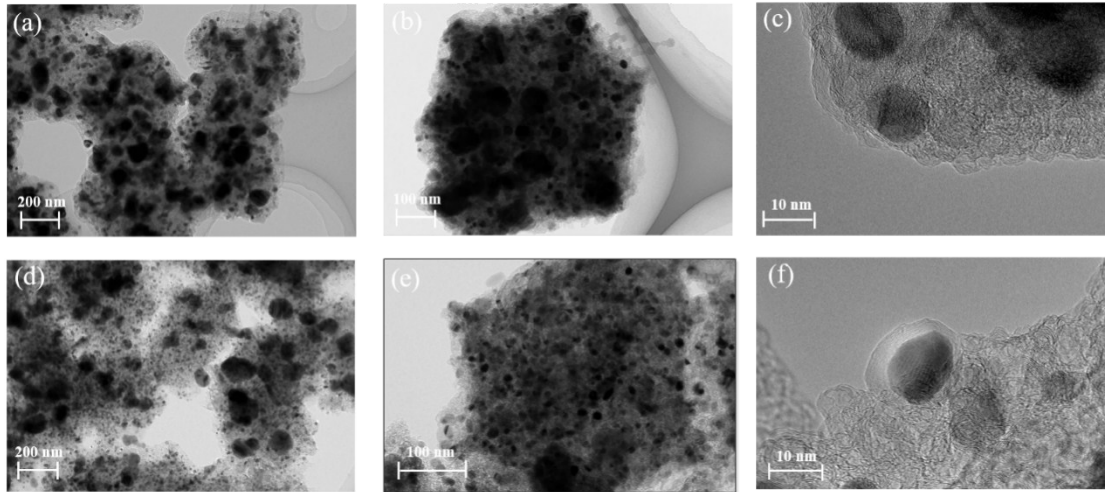

Figure S6. TEM images of (a,b,c) Co-N-C-0 and (d,e,f) Co-N-C-0.2.

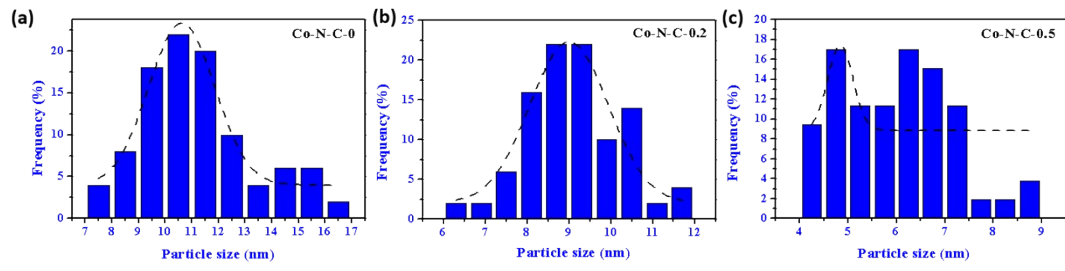

Figure S7. The size distribution of (a) Co-N-C-0; (b) Co-N-C-0.2; (c) Co-N-C-0.5.

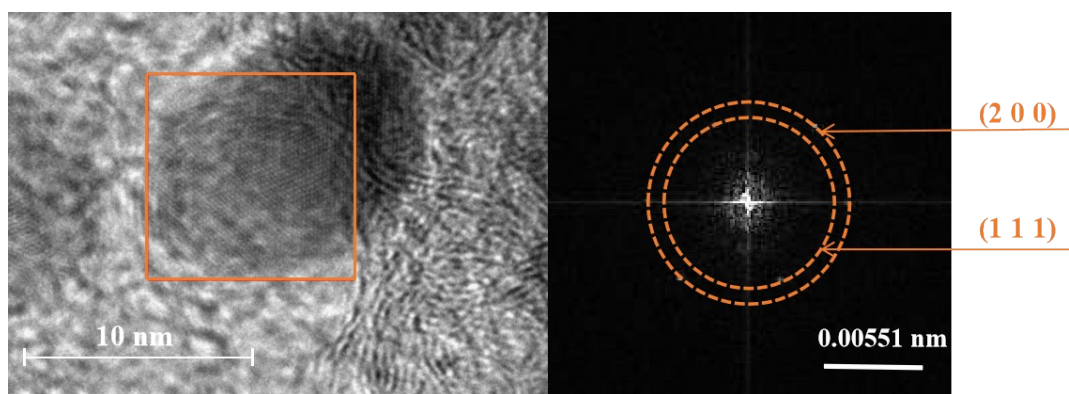

Figure S8. SAED of Co-N-C-0.5

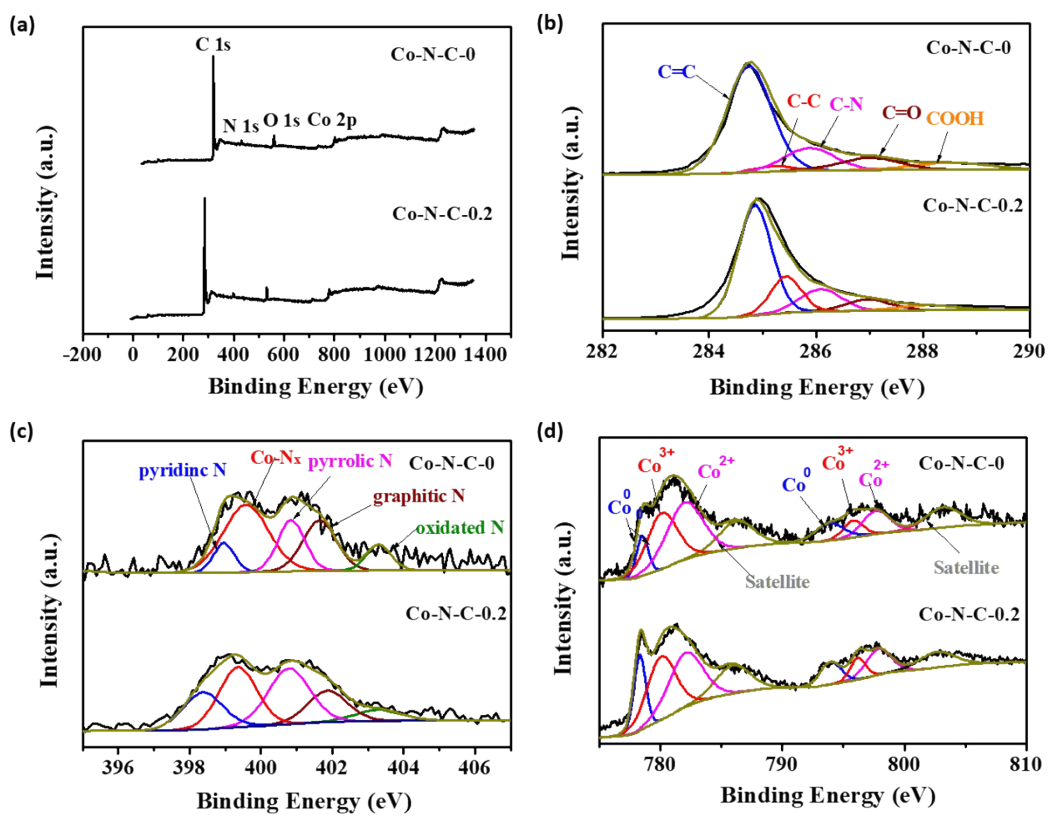

Figure S9. (a) XPS survey spectra and high-resolution spectra of (b) C 1s, (c) N 1s and (d) Co 2p of Co-N-C-0 and Co-N-C-0.5 catalysts.

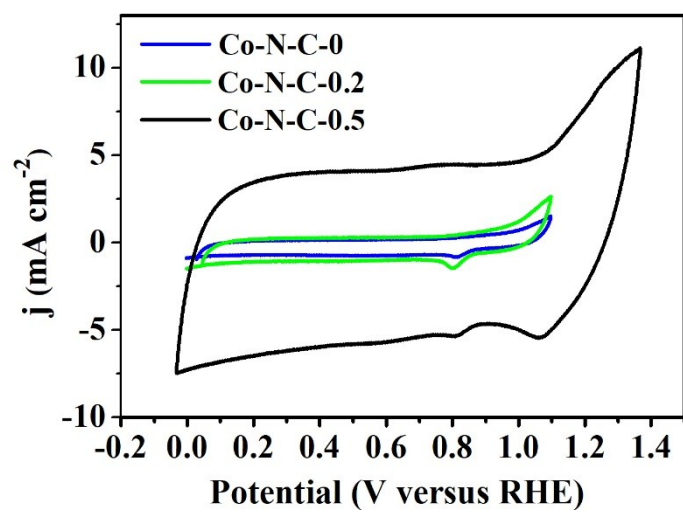

Figure S10. CV curves of different catalysts.



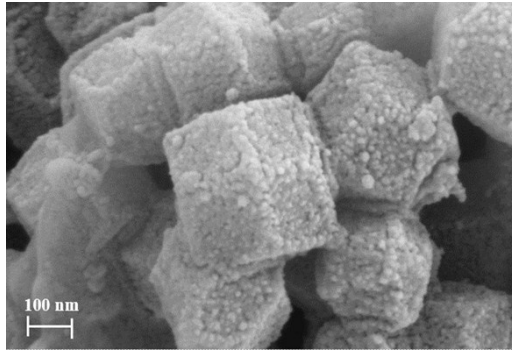

Figure S11. FESEM images of Co-N-C-0.5 after 20 cycles.

## Reference

- [1] Qian Y , Hu Z , Ge X , et al. A metal-free ORR/OER bifunctional electrocatalyst derived from metal-organic frameworks for rechargeable Zn-Air batteries[J]. Carbon, 2017, 111:641-650.
- [2] Guo H , Feng Q , Zhu J , et al. Cobalt nanoparticle-embedded nitrogen-doped carbon/carbon nanotube frameworks derived from metal-organic framework for tri-functional ORR, OER and HER electrocatalysis[J]. Journal of Materials Chemistry A, 2019, 7(8):3664-3672.
- [3] Chen B, He X, Yin F, et al. MO-Co@ N-doped carbon (M= Zn or Co): vital roles of inactive Zn and highly efficient activity toward oxygen reduction/evolution reactions for rechargeable Zn-Air battery[J]. Advanced Functional Materials, 2017, 27(37): 1700795.
- [4] Chen Y , Guo Y , Cui H , et al. Bifunctional electrocatalysts of MOF-derived Co-N/C on bamboo-like MnO nanowires for high-performance liquid and solid-state Zn-air batteries[J]. Journal of Materials Chemistry A, 2018, 6(20): 9716-9722.
- [5] Hao Y, Xu Y, Liu W, et al. Co/CoP embedded in a hairy nitrogen-doped carbon polyhedron as an advanced tri-functional electrocatalyst[J]. Materials Horizons, 2018, 5(1): 108-115.
- [6] Lu H S, Zhang H, Zhang X, et al. Transformation of carbon-encapsulated metallic Co into ultrafine Co/CoO nanoparticles exposed on N-doped graphitic carbon for high-performance rechargeable zinc-air battery[J]. Applied Surface Science, 2018, 448: 369-379.

- [7] Liang F, Hayashi K. A High-Energy-Density Mixed-Aprotic-Aqueous Sodium-Air Cell with a Ceramic Separator and a Porous Carbon Electrode[J]. *Journal of the Electrochemical Society*, 2015, 162(7): A1215-A1219.
- [8] Senthilkumar B, Khan Z, Park S, et al. Exploration of cobalt phosphate as a potential catalyst for rechargeable aqueous sodium-air battery[J]. *Journal of Power Sources*, 2016, 311:29-34.
- [9] Kang Y, Zou D, Zhang J, et al. Dual-phase Spinel  $\text{MnCo}_2\text{O}_4$  Nanocrystals with Nitrogen-doped Reduced Graphene Oxide as Potential Catalyst for Hybrid Na-Air Batteries[J]. *Electrochimica Acta*, 2017, 244:222-229.
- [10] Sahgong S H, Senthilkumar S T, Kim K, et al. Rechargeable aqueous Na-air batteries: Highly improved voltage efficiency by use of catalysts[J]. *Electrochemistry Communications*, 2015, 61: 53-56.
- [11] Khan Z, Senthilkumar B, Park S O, et al. Carambola-shaped  $\text{VO}_2$  nanostructures: a binder-free air electrode for an aqueous Na-air battery[J]. *Journal of Materials Chemistry A*, 2017, 5(5): 2037-2044.
